# Supplementary material
Source: PubMed Central journal article supplement (PMC8085480)
Supplement: bloodBLD2020009499-suppl1.pdf [file bloodBLD2020009499-suppl1.pdf]

**A**

| HLH associated genes | N | Disease causing (biallelic/hemizygous) | Single allele (ambiguous) |
|----------------------|---|----------------------------------------|---------------------------|
| <i>PRF1</i>          | 6 | 5                                      | 1                         |
| <i>UNC13A</i>        | 9 | 8                                      | 1                         |
| <i>STXBP2</i>        | 6 | 4                                      | 2                         |
| <i>SH2D1A</i>        | 3 | 3                                      | 0                         |
| <i>RAB27A</i>        | 1 | 1                                      | 0                         |

**B**

| Age (Years) | HLH (N) (% of total) | Sepsis (N) (% of total) |
|-------------|----------------------|-------------------------|
| 0-1         | 13 (30%)             | 4 (22%)                 |
| >1-4        | 15 (35%)             | 8 (44%)                 |
| >4-16       | 10 (23%)             | 5 (28%)                 |
| >16-25      | 15 (12%)             | 1 (6%)                  |

**C**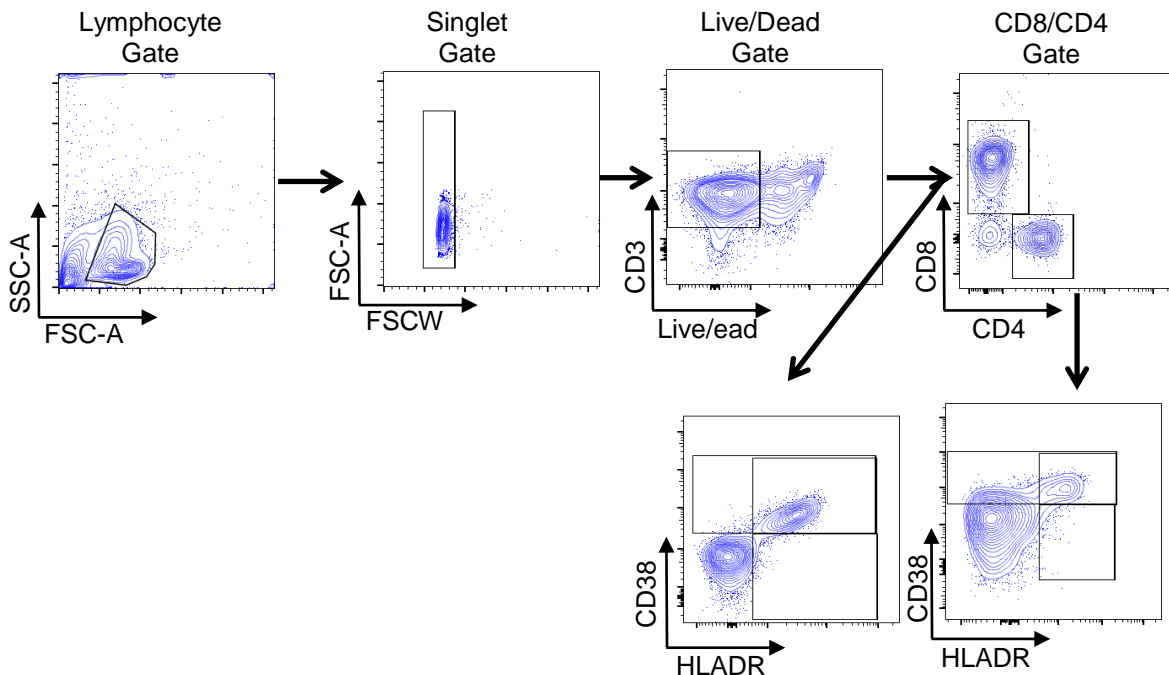

**Supplemental Figure 1. Additional subject information and gating strategy for analysis of CD4+ and CD8+ T cells. (A)** Additional details of HLH associated genetic mutations in the HLH cohort. **(B)** Age distribution of our cohorts with HLH or sepsis. **(C)** Gating strategy for analysis of CD4+ and CD8+ T cells.

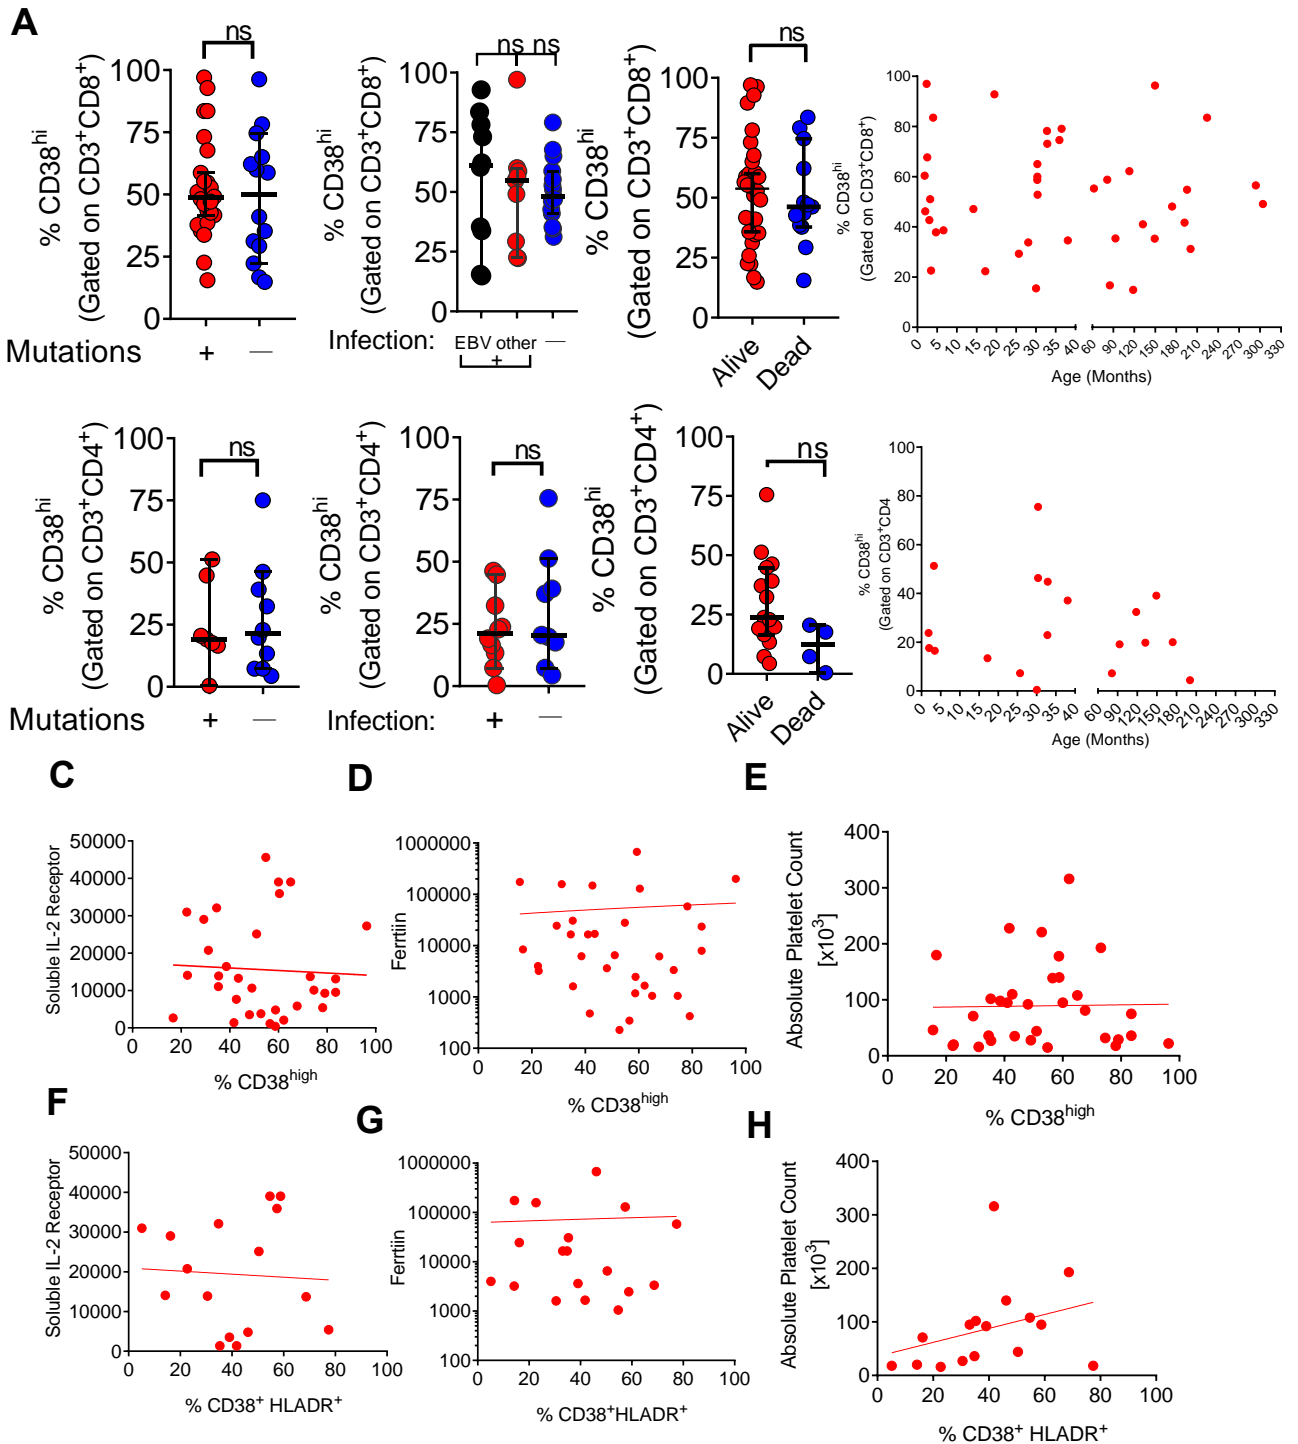

**Supplemental Figure 2. Additional comparisons of T cell populations and clinical features in patients with HLH.** (A-B) Frequency of CD38<sup>high</sup> CD8<sup>+</sup> or CD4<sup>+</sup> T cells in patients with HLH is plotted, comparing presence of HLH-associated mutation, identifiable infection at diagnosis, survival, or age. (C-E) Frequency of CD38<sup>high</sup> CD8<sup>+</sup> T cells as a percentage of CD8<sup>+</sup> T cells in patients with HLH are plotted against the indicated clinical indices. (F-H) Frequency of CD38<sup>high</sup>/HLA-DR<sup>+</sup> (double positive) CD8<sup>+</sup> T cells as a percentage of CD8<sup>+</sup> T cells in patients with HLH are plotted against the indicated clinical indices.

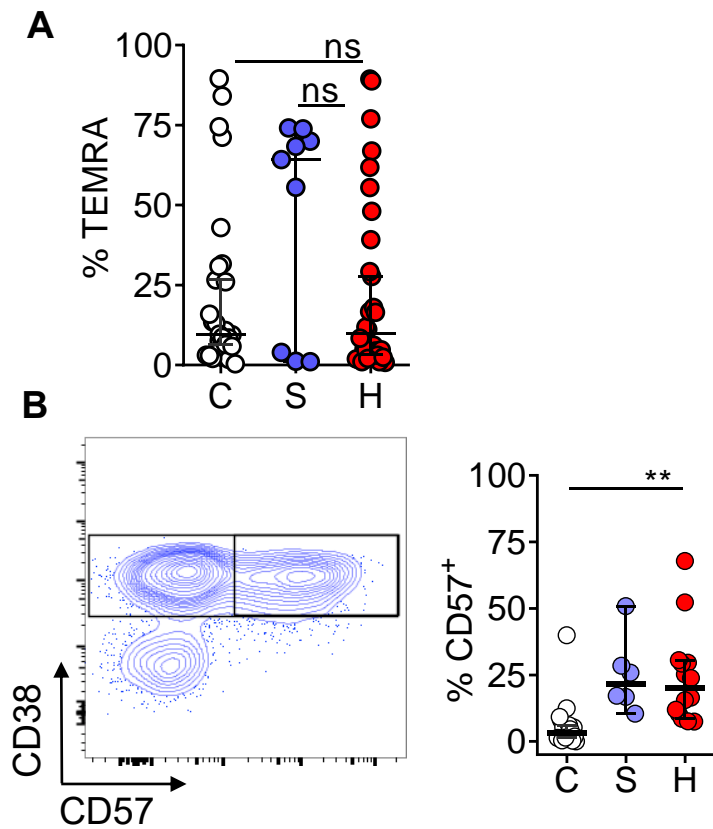

**Supplemental Figure 3. Additional phenotyping of CD8+ T cells in patients with HLH. A.** Frequency of CD45RA+ / CCR7- (TEMRA) cells among CD38<sup>high</sup>/HLA-DR<sup>+</sup> (double positive) CD8<sup>+</sup> T cells in patients with HLH. **B.** Frequency of CD57+ cells among CD38<sup>high</sup>/HLA-DR<sup>+</sup> (double positive) CD8<sup>+</sup> T cells in patients with HLH

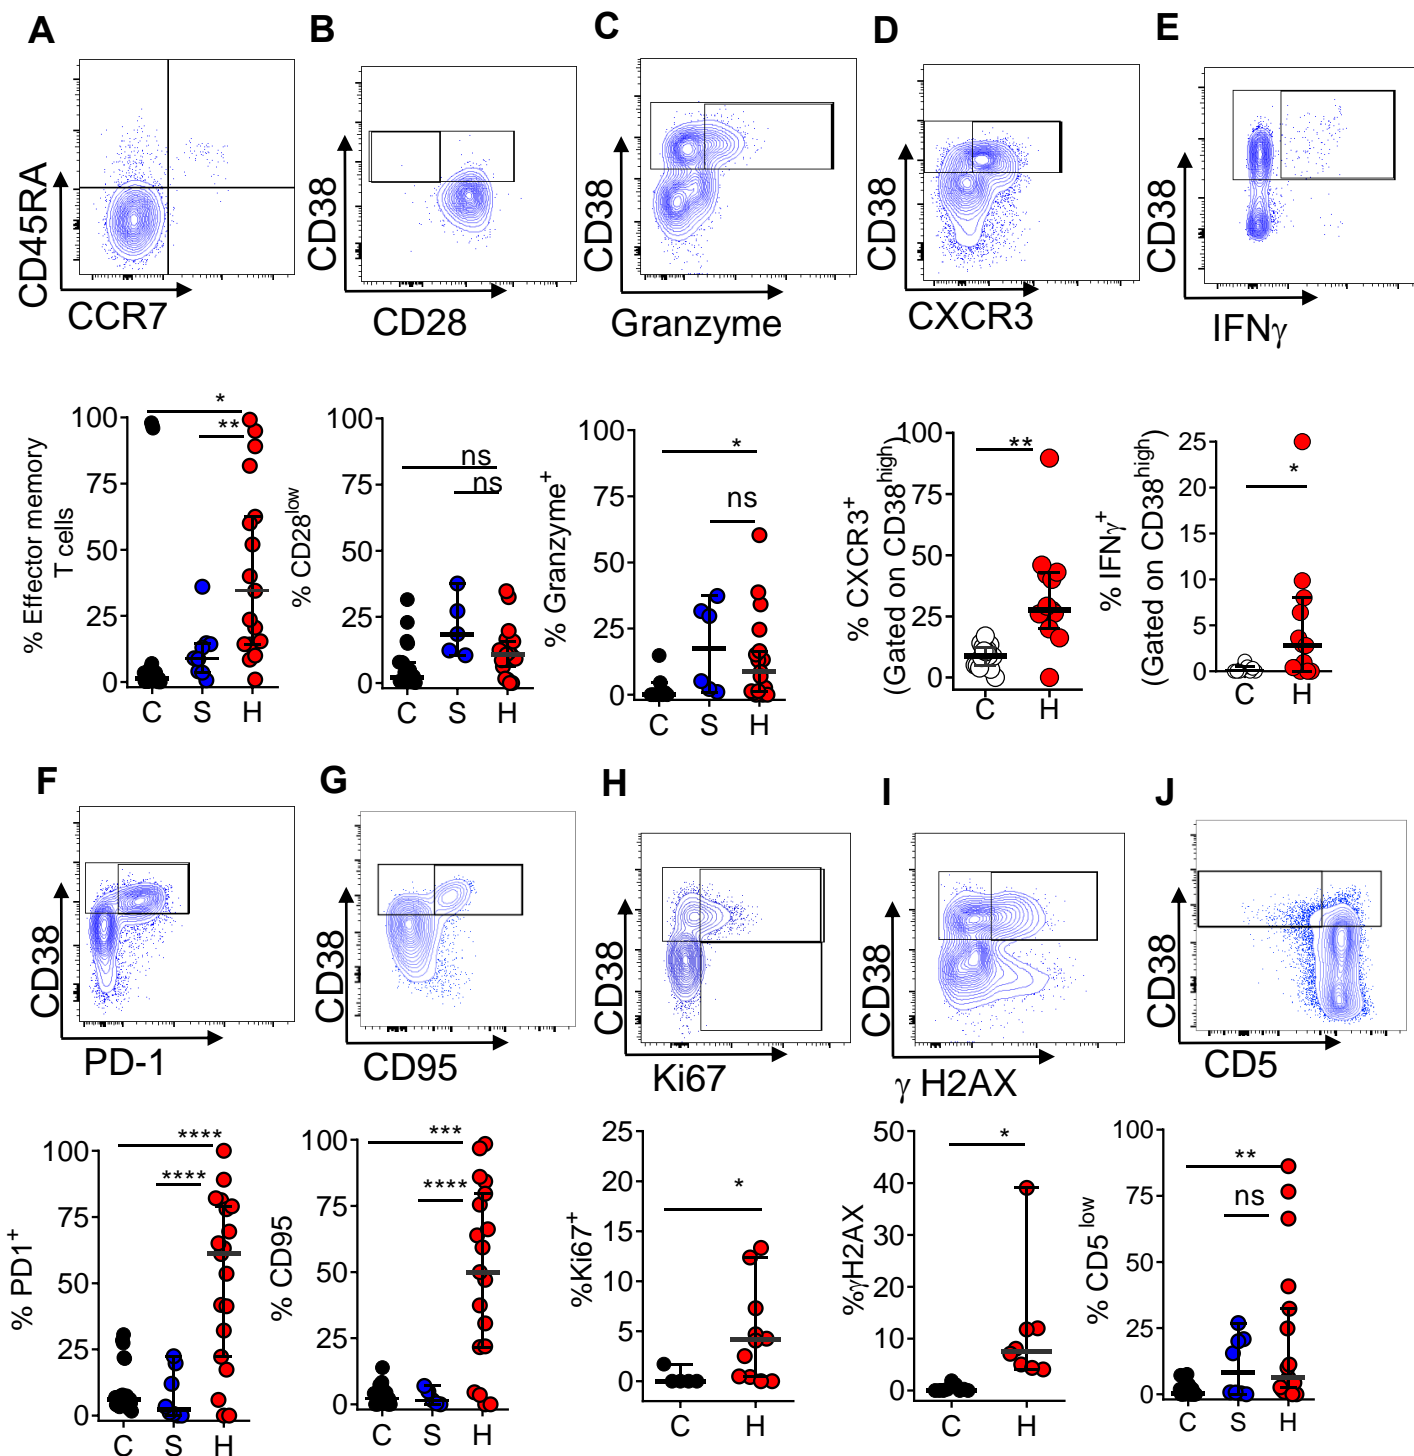

**Supplemental Figure 4. Extended phenotype of CD38<sup>high</sup> CD4<sup>+</sup> T cells in patients with HLH.** A-J Representative FACS plots and cumulative data comparing the frequency of the indicated markers within CD38<sup>high</sup> CD4<sup>+</sup> T cells in pediatric controls (C), patients with sepsis (S), or patients with HLH (H). For controls and patients with sepsis, frequency shown is derived from gating on the top 10% of CD38 expressing CD4<sup>+</sup> T cells.

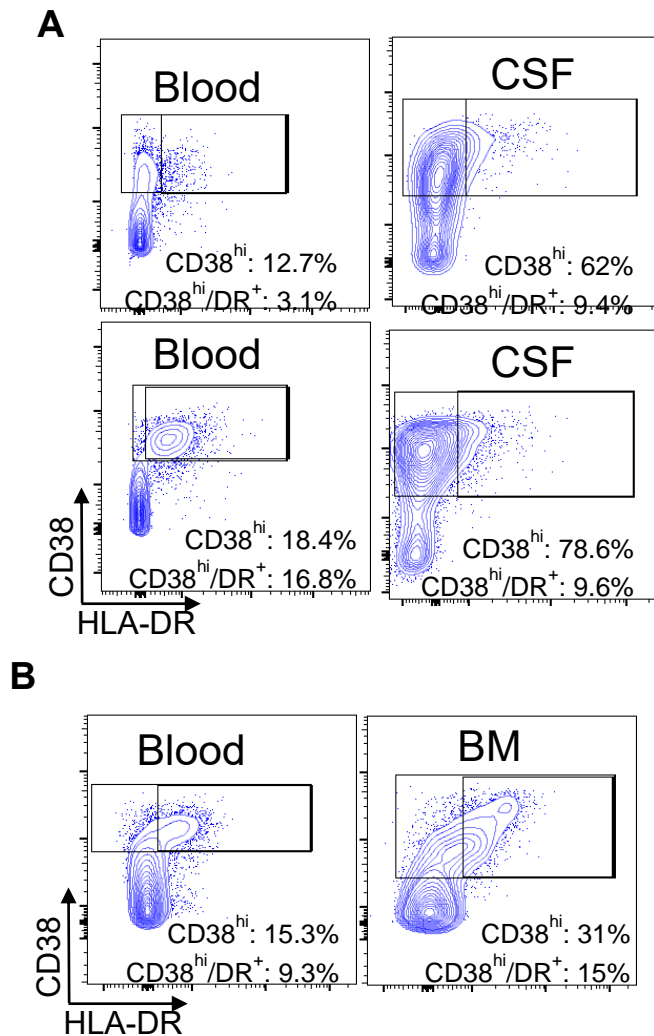

**Supplemental Figure 5. Tissue infiltrating CD4+ T cells in patients with HLH are more activated than concurrently circulating T cells in blood.** (A) Representative FACS plots of CD4+ T cells from patients with HLH, comparing blood and cerebrospinal fluid (CSF) or (B) blood and bone marrow (BM) in samples obtained concurrently from three different patients.

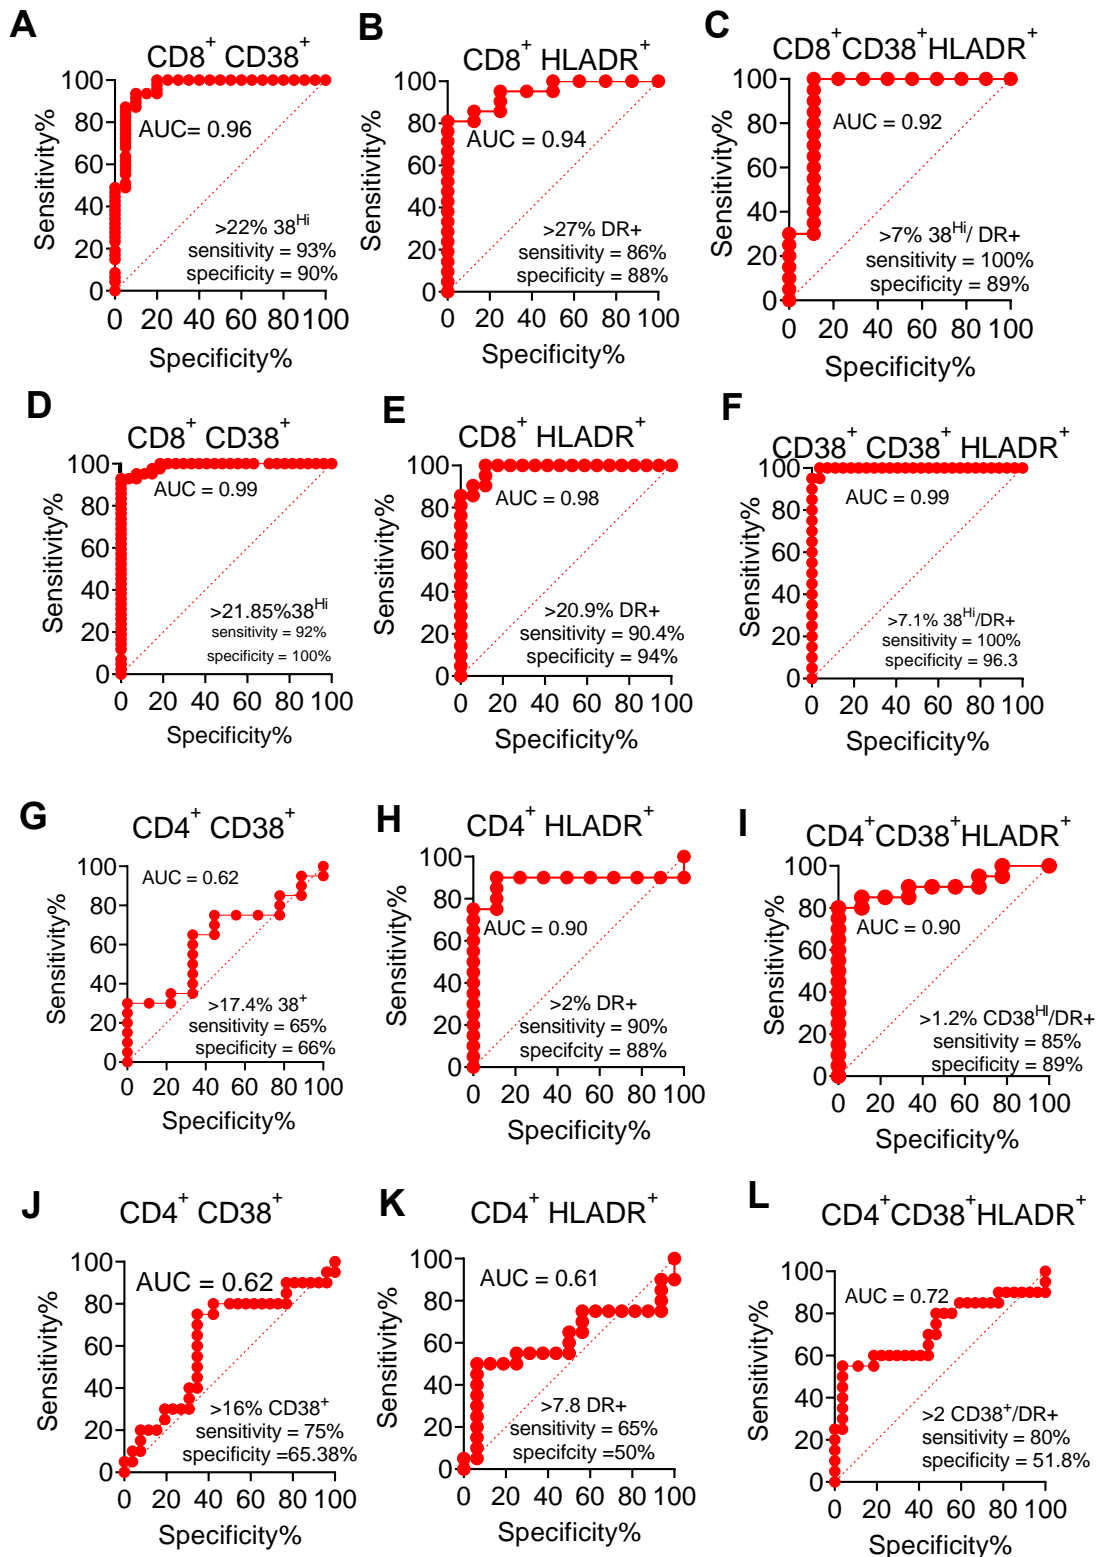

**Supplemental Figure 6. ROC analyses comparing indicated populations in patients with HLH to those with sepsis or healthy controls. A-C** ROC analysis of indicated CD8<sup>+</sup> cell populations, comparing HLH and sepsis. **D-F** ROC analysis of indicated CD8<sup>+</sup> cell populations, comparing HLH and control. **G-I** ROC analysis of indicated CD4<sup>+</sup> cell populations, comparing HLH and sepsis. **J-L** ROC analysis of indicated CD4<sup>+</sup> cell populations, comparing HLH and control

| <b>Low false positive Activation Marker</b>                       | <b>Sensitivity (95% CI)</b> | <b>Specificity (95% CI)</b> | <b>PPV (95% CI)</b>      | <b>NPV (95% CI)</b>   | <b>LR</b> |
|-------------------------------------------------------------------|-----------------------------|-----------------------------|--------------------------|-----------------------|-----------|
| CD8 <sup>+</sup> CD38 <sup>+</sup> >22%                           | 0.93<br>(0.81 -0.97)        | 0.96<br>(0.82-1.0)          | 0.97<br>(0.87-1)         | 0.9<br>(0.74-0.96)    | 26.0      |
| CD8 <sup>+</sup> HLADR <sup>+</sup> >21%                          | 0.90<br>(0.72-0.98)         | 0.96<br>(0.80-1.00)         | 0.95<br>(0.77-1.0)       | 0.92<br>(0.75-0.98)   | 22.7      |
| <b>CD8<sup>+</sup> CD38<sup>+</sup>/ HLADR<sup>+</sup> &gt;7%</b> | <b>1.0<br/>(0.85-1)</b>     | <b>0.96<br/>(0.81-1.0)</b>  | <b>0.95<br/>(0.79-1)</b> | <b>1<br/>(0.87-1)</b> | <b>27</b> |
| CD4 <sup>+</sup> CD38 <sup>+</sup> >16%                           | 0.75<br>(0.53-0.88)         | 0.66<br>(0.48-0.81)         | 0.62<br>(0.42-0.79)      | 0.78<br>(0.58-0.90)   | 2.2       |
| CD4 <sup>+</sup> HLADR <sup>+</sup> >7.8%                         | 0.73<br>(0.51-0.88)         | 0.43<br>(0.25-0.63)         | 0.51<br>(0.34-0.69)      | 0.66<br>(0.41-0.85)   | 1.3       |
| CD4 <sup>+</sup> CD38 <sup>+</sup> / HLADR <sup>+</sup> >2%       | 0.80<br>(0.58-0.92)         | 0.51<br>(0.34-0.69)         | 0.55<br>(0.37-0.71)      | 0.77<br>(0.54-0.91)   | 1.67      |

**Supplemental Table 1. T cell activation parameters distinguishing patients with HLH from healthy pediatric controls. (PPV = Positive Predictive Value; NPV = Negative Predictive Value, LR= Likelihood Ratio)**
